# Supplementary material for: Generating political priority for breastfeeding and the adoption of Kenya’s 2012 BMS act: the importance of women’s leadership
Source: Springer Nature journal article supplement (doi:10.1186/s12992-025-01127-2), 2025-05-29
Supplement: MOESM1 [file 12992_2025_1127_MOESM1_ESM.pdf]

**Table S1.** List of key-informant interviews

| #   | Institution                                 | Date          |
|-----|---------------------------------------------|---------------|
| 1.  | Kenyatta University                         | March 2023    |
| 2.  | Ministry of Health Kenya                    | March 2023    |
| 3.  | Scaling Up Nutrition Civil Society Alliance | March 2023    |
| 4.  | Ministry of Health Kenya                    | April 2023    |
| 5.  | Kenya Women Parliamentary Association       | April 2023    |
| 6.  | University of Nairobi                       | April 2023    |
| 7.  | Scaling Up Nutrition Civil Society Alliance | April 2023    |
| 8.  | Kenya Bureau of Standards                   | April 2023    |
| 9.  | Ministry of Health Kenya                    | June 2023     |
| 10. | Kenya Bureau of Standards                   | October 2023  |
| 11. | Kenya Association of Manufacturers          | October 2023  |
| 12. | Danone                                      | October 2023  |
| 13. | Kenya Paediatric Association                | October 2023  |
| 14. | UNICEF Kenya                                | November 2023 |
| 15. | UNICEF International                        | March 2024    |
| 16. | Ministry of Health Kenya                    | March 2024    |
| 17. | Kenyatta National Hospital                  | April 2024    |
| 18. | Abbott Kenya                                | April 2024    |
| 19. | UNICEF Kenya                                | May 2024      |
| 20. | WHO Kenya                                   | July 2024     |
| 21. | IBFAN Kenya                                 | August 2024   |
